# Supplementary material
Source: ML conference proceedings conference paper supplement (https://aclanthology.org/D17-1217)
Supplement: Attachment [file D17-1217.Attachment.pdf]

| Data         | Aspect              | Seeds                                              |
|--------------|---------------------|----------------------------------------------------|
| TripAdvisor  | Value               | value, price, worth, cost, \$                      |
|              | Room                | room, suite, view, bed, shower                     |
|              | Location            | location, traffic, minute, convenience, restaurant |
|              | Cleanliness         | clean, dirty, maintain, smell, spotless            |
|              | Check in/Front desk | stuff, check-in, help, reservation, airport        |
|              | Service             | service, food, breakfast, buffet, staff            |
| BeerAdvocate | Business Service    | business, center, computer, internet, customer     |
|              | Feel                | feel, dryness, softness, sharpness, touch          |
|              | Look                | look, appearance, color, dark, transparency        |
|              | Smell               | smell, aroma, nose, smelly, sniff                  |
|              | Taste               | taste, flavor, sugary, earthy, bitter              |

Table 1: Aspect Seeds.
